# Supplementary material for: Effect of HIV infection on growth and bone density in peripubertal children in the era of antiretroviral therapy: a cross-sectional study in Zimbabwe
Source: PubMed Central journal article supplement (PMC8295041; doi:10.1016/s2352-4642(21)00133-4), 2021-08
Supplement: mmc1.pdf [file mmc1.pdf]

# THE LANCET

## Child & Adolescent Health

### Supplementary appendix

This appendix formed part of the original submission and has been peer reviewed. We post it as supplied by the authors.

Supplement to: Rukuni R, Rehman AM, Mukwasi-Kahari C, et al. Effect of HIV infection on growth and bone density in peripubertal children in the era of antiretroviral therapy: a cross-sectional study in Zimbabwe. *Lancet Child Adolesc Health* 2021; published online June 14. [https://doi.org/10.1016/S2352-4642\(21\)00133-4](https://doi.org/10.1016/S2352-4642(21)00133-4).

**Supplementary materials (Tables 1-5) for 'Effect of HIV infection on growth and bone density in peripubertal children in the era of antiretroviral therapy: a cross-sectional study in Zimbabwe'. Rukuni et al.**

**Supplementary Table 1. Characteristics of participants who did and did not have bone outcomes measured by DXA**

|                                                    |                                           | DXA (n=571) |                    | Missing DXA (n=38) |                    | p value |
|----------------------------------------------------|-------------------------------------------|-------------|--------------------|--------------------|--------------------|---------|
|                                                    |                                           | N           | n (%) <sup>a</sup> | N                  | n (%) <sup>a</sup> |         |
| <b>Socio-demographic factors</b>                   | Age years, mean (SD)                      | 571         | 12.4 (2.5)         | 38                 | 12.9 (2.7)         | 0.269   |
|                                                    | Female sex                                | 571         | 287 (50.3)         | 38                 | 19 (50.0)          | 0.975   |
|                                                    | Socioeconomic status (SES)                |             |                    |                    |                    |         |
|                                                    | Tertile 1 (low)                           | 571         | 191 (33.5)         | 38                 | 12 (31.6)          | 0.456   |
|                                                    | Tertile 2 (middle)                        |             | 187 (32.8)         |                    | 16 (42.1)          |         |
|                                                    | Tertile 3 (high)                          |             | 193 (33.8)         |                    | 10 (26.3)          |         |
| Orphanhood (one or both parents dead) <sup>b</sup> | 556                                       | 132 (23.7)  | 37                 | 11 (29.7)          | 0.410              |         |
| <b>Lifestyle factors</b>                           | Outdoor time >2 hours/day                 | 571         | 365 (64.0)         | 38                 | 30 (79.0)          | 0.060   |
|                                                    | Physical activity level                   |             |                    |                    |                    |         |
|                                                    | Low, <600 MET mins/week                   | 571         | 244 (42.7)         | 38                 | 18 (47.4)          | 0.464   |
|                                                    | Moderate, 600-3000 MET mins/week          |             | 153 (26.8)         |                    | 12 (31.6)          |         |
|                                                    | High, >3000 MET mins/week                 |             | 174 (30.5)         |                    | 8 (21.1)           |         |
|                                                    | Daily dietary calcium intake              |             |                    |                    |                    |         |
|                                                    | Very low, <150 mg/day                     | 571         | 253 (44.3)         | 38                 | 18 (47.4)          | 0.459   |
|                                                    | Low, 150-299 mg/day                       |             | 123 (21.5)         |                    | 5 (13.2)           |         |
| Moderate, 300-450 mg/day                           |                                           | 195 (34.2)  |                    | 15 (39.5)          |                    |         |
| Daily dietary vitamin D                            |                                           |             |                    |                    |                    |         |
| Very low, <4.0 mcg/day                             | 571                                       | 74 (13.0)   | 38                 | 3 (7.9)            | 0.393              |         |
| Low, 4.0-5.9 mcg/day                               |                                           | 378 (66.2)  |                    | 24 (63.2)          |                    |         |
| Moderate, 6.0-8.0 mcg/day                          |                                           | 119 (20.8)  |                    | 11 (29.0)          |                    |         |
| <b>Pubertal stage</b>                              | Tanner I                                  | 553         | 175 (31.7)         | 37                 | 11 (30.0)          | 0.407   |
|                                                    | Tanner II                                 |             | 121 (21.9)         |                    | 7 (18.9)           |         |
|                                                    | Tanner III                                |             | 98 (17.7)          |                    | 10 (27.0)          |         |
|                                                    | Tanner IV                                 |             | 127 (23.0)         |                    | 9 (24.3)           |         |
|                                                    | Tanner V                                  |             | 32 (5.8)           |                    | 0 (0.0)            |         |
|                                                    | Pubertal delay <sup>c</sup>               | 239         | 7 (2.9)            | 20                 | 1 (5.0)            | 0.479   |
| <b>HIV characteristics</b>                         | Age at HIV diagnosis years, median (IQR)  | 279         | 2.9 (1.2; 5.9)     | 24                 | 3.5(1.5;5.5)       | 0.787   |
|                                                    | Age at ART initiation years, median (IQR) | 279         | 3.7 (1.9; 7.0)     | 24                 | 4.0 (1.6;5.8)      | 0.759   |
|                                                    | ART duration years, median (IQR)          | 279         | 8.0 (6.1; 9.6)     | 24                 | 8.3 (7.3;9.4)      | 0.340   |
|                                                    | % life on ART, mean (SD)                  | 279         | 65.1 (22.5)        | 24                 | 69.4 (17.0)        | 0.359   |
|                                                    | Current TDF use                           | 571         | 95 (16.6)          | 38                 | 7 (18.4)           | 0.776   |
|                                                    | Viral load <1,000 copies/ml               | 261         | 207 (79.3)         | 7                  | 5 (71.4)           | 0.613   |
|                                                    | CD4 count <500 cells/μL                   | 267         | 54 (20.2)          | 21                 | 4 (19.1)           | 0.897   |
| <b>Anthropometry</b>                               | Standing height Z-score, mean (SD)        | 571         | -1.1 (1.3)         | 37                 | -1.6 (1.5)         | 0.044   |
|                                                    | Height-for-age Z-score <-2                | 571         | 112 (19.6)         | 37                 | 9 (24.3)           | 0.487   |
|                                                    | Sitting height for age Z-score, mean (SD) | 568         | -1.73 (1.2)        | 38                 | -1.92 (1.3)        | 0.354   |
|                                                    | Sitting height-for-age Z-score <-2        | 568         | 214 (37.7)         | 38                 | 14 (36.8)          | 0.918   |
|                                                    | Weight-for-age Z-score, mean (SD)         | 569         | -0.98 (1.3)        | 38                 | -1.36 (1.2)        | 0.075   |
|                                                    | Weight-for-age Z-score <-2                | 569         | 100 (17.6)         | 38                 | 5 (13.2)           | 0.486   |
|                                                    | BMI Z-score, mean (SD)                    | 569         | -0.44 (1.1)        | 37                 | -0.64 (1.2)        | 0.283   |
|                                                    | BMI Z-score <-2                           | 569         | 38 (6.7)           | 37                 | 8 (21.6)           | 0.001   |
|                                                    | Mid upper arm circumference               | 569         | 20.6 (3.2)         | 38                 | 20.4 (3.0)         | 0.719   |

<sup>a</sup> n(%) unless stated otherwise; <sup>b</sup> one or both parents dead; <sup>c</sup> definition included girls >13 years and boys >14 years

**Supplementary Table 2. Characteristics of participants with complete data for study outcome, tanner stage, orphanhood and among CWH with CD4 cell count and HIV viral load, compared to those with missing data for one or more variables**

|                                                    | Non-missing (n=512)                       |                    | Missing (n=97) |                    | p value       |        |
|----------------------------------------------------|-------------------------------------------|--------------------|----------------|--------------------|---------------|--------|
|                                                    | N                                         | n (%) <sup>a</sup> | N              | n (%) <sup>a</sup> |               |        |
| <b>Socio-demographic factors</b>                   | Age years, mean (SD)                      | 512                | 12.4 (2.5)     | 97                 | 12.8 (2.5)    | 0.230  |
|                                                    | Female sex                                | 512                | 256 (50.0)     | 97                 | 50 (51.6)     | 0.780  |
|                                                    | Socioeconomic status (SES)                |                    |                |                    |               | 0.182  |
|                                                    | Tertile 1 (low)                           | 512                | 173 (33.8)     | 97                 | 30 (30.9)     |        |
|                                                    | Tertile 2 (middle)                        |                    | 163 (31.8)     |                    | 40 (41.2)     |        |
|                                                    | Tertile 3 (high)                          |                    | 176 (34.4)     |                    | 27 (27.8)     |        |
| Orphanhood (one or both parents dead) <sup>b</sup> | 512                                       | 115 (22.5)         | 81             | 28 (34.6)          | 0.018         |        |
| <b>Lifestyle factors</b>                           | Outdoor time >2 hours/day                 | 512                | 320 (62.5)     | 97                 | 75 (77.3)     | 0.005  |
|                                                    | Physical activity level                   |                    |                |                    |               | 0.038  |
|                                                    | Low, <600 MET mins/week                   | 512                | 211 (41.2)     | 97                 | 51 (52.6)     |        |
|                                                    | Moderate, 600-3000 MET mins/week          |                    | 138 (27.0)     |                    | 27 (27.8)     |        |
|                                                    | High, >3000 MET mins/week                 |                    | 163 (31.8)     |                    | 19 (19.6)     |        |
|                                                    | Daily dietary calcium intake              |                    |                |                    |               | 0.451  |
|                                                    | Very low, <150 mg/day                     | 512                | 227 (44.3)     | 97                 | 44 (45.4)     |        |
|                                                    | Low, 150-299 mg/day                       |                    | 112 (21.9)     |                    | 16 (16.5)     |        |
|                                                    | Moderate, 300–450 mg/day                  |                    | 173 (33.8)     |                    | 37 (38.1)     |        |
|                                                    | Daily dietary vitamin D                   |                    |                |                    |               | 0.882  |
| Very low, <4.0 mcg/day                             | 512                                       | 66 (12.9)          | 97             | 11 (11.3)          |               |        |
| Low, 4.0-5.9 mcg/day                               |                                           | 338 (66.0)         |                | 64 (66.0)          |               |        |
| Moderate, 6.0-8.0 mcg/day                          |                                           | 108 (21.1)         |                | 22 (22.7)          |               |        |
| <b>Pubertal stage</b>                              | Tanner I                                  | 512                | 163 (31.8)     | 78                 | 23 (29.5)     | 0.294  |
|                                                    | Tanner II                                 |                    | 108 (21.1)     |                    | 20 (25.6)     |        |
|                                                    | Tanner III                                |                    | 89 (17.4)      |                    | 19 (24.4)     |        |
|                                                    | Tanner IV                                 |                    | 122 (23.8)     |                    | 14 (18.0)     |        |
|                                                    | Tanner V                                  |                    | 30 (5.9)       |                    | 2 (2.6)       |        |
|                                                    | Pubertal delay <sup>c</sup>               | 222                | 7 (3.2)        | 37                 | 1 (2.7)       | 0.680  |
| <b>HIV characteristics</b>                         | Age at HIV diagnosis years, median (IQR)  | 226                | 3.0 (1.1; 5.8) | 77                 | 3.0 (1.5;5.7) | 0.787  |
|                                                    | Age at ART initiation years, median (IQR) | 226                | 3.7 (1.8; 7.0) | 77                 | 3.6 (1.8;6.4) | 0.922  |
|                                                    | ART duration years, median (IQR)          | 226                | 7.9 (6.0; 9.4) | 77                 | 8.6 (6.5;9.7) | 0.094  |
|                                                    | % life on ART, mean (SD)                  | 226                | 64.9 (22.6)    | 77                 | 67.0 (20.7)   | 0.481  |
|                                                    | Current TDF use                           | 226                | 77 (34.1)      | 77                 | 25 (32.5)     | 0.797  |
|                                                    | Viral load <1,000 copies/ml               | 226                | 179 (79.2)     | 42                 | 33 (78.6)     | 0.926  |
|                                                    | CD4 count <500 cells/ $\mu$ L             | 226                | 44 (19.5)      | 62                 | 14 (22.6)     | 0.588  |
| <b>Anthropometry</b>                               | Standing height Z-score, mean (SD)        | 512                | -1.1 (1.2)     | 96                 | -1.6 (1.3)    | 0.0001 |
|                                                    | Height-for-age Z-score <-2                | 512                | 95 (18.6)      | 96                 | 26 (27.1)     | 0.055  |
|                                                    | Sitting height for age Z-score, mean (SD) | 511                | -1.7 (1.2)     | 95                 | -2.1 (1.2)    | 0.003  |
|                                                    | Sitting height-for-age Z-score <-2        | 511                | 185 (36.2)     | 95                 | 43 (45.3)     | 0.094  |
|                                                    | Weight-for-age Z-score, mean (SD)         | 512                | -0.9 (1.3)     | 95                 | -1.4 (1.3)    | 0.003  |
|                                                    | Weight-for-age Z-score <-2                | 512                | 88 (17.2)      | 95                 | 17 (17.9)     | 0.867  |
|                                                    | BMI Z-score, mean (SD)                    | 512                | -0.4 (1.1)     | 94                 | -0.6 (1.2)    | 0.229  |
|                                                    | BMI Z-score <-2                           | 512                | 31 (6.1)       | 94                 | 15 (16.0)     | 0.001  |
|                                                    | Mid upper arm circumference               | 512                | 20.6 (3.2)     | 95                 | 20.5 (2.9)    | 0.813  |

**Supplementary Table 3. Number and percentage of participants by HIV status, pubertal stage, age group and sex**

| Tanner stage    | Participants with HIV n=287 <sup>a</sup> |           |           |       | Participants without HIV n=303 <sup>b</sup> |           |           |       |
|-----------------|------------------------------------------|-----------|-----------|-------|---------------------------------------------|-----------|-----------|-------|
| MALES (n=292)   | Age (Years)                              |           |           |       | Age (Years)                                 |           |           |       |
|                 | 8-10                                     | 11-13     | 14-16     | Total | 8-10                                        | 11-13     | 14-16     | Total |
| Tanner I        | 41 (80.4)                                | 12 (26.1) | 4 (8.9)   | 57    | 39 (79.6)                                   | 6 (12.0)  | 0 (0.0)   | 45    |
| Tanner II       | 10 (19.6)                                | 19 (41.3) | 10 (22.2) | 39    | 9 (18.4)                                    | 25 (50.0) | 0 (0.0)   | 34    |
| Tanner III      | 0 (0.0)                                  | 13 (28.3) | 9 (20.0)  | 22    | 1 (2.0)                                     | 13 (26.0) | 10 (19.6) | 24    |
| Tanner IV       | 0 (0.0)                                  | 2 (4.3)   | 17 (37.8) | 19    | 0 (0.0)                                     | 6 (12.0)  | 37 (72.5) | 43    |
| Tanner V        | 0 (0.0)                                  | 0 (0.0)   | 5 (11.1)  | 5     | 0 (0.0)                                     | 0 (0.0)   | 4 (7.8)   | 4     |
| FEMALES (n=298) | Age (Years)                              |           |           |       | Age (Years)                                 |           |           |       |
|                 | 8-10                                     | 11-13     | 14-16     | Total | 8-10                                        | 11-13     | 14-16     | Total |
| Tanner I        | 46 (93.9)                                | 12 (25.5) | 2 (4.1)   | 60    | 24 (52.2)                                   | 0 (0.0)   | 0 (0.0)   | 24    |
| Tanner II       | 3 (6.1)                                  | 12 (25.5) | 5 (10.2)  | 20    | 17 (36.9)                                   | 18 (35.3) | 0 (0.0)   | 35    |
| Tanner III      | 0 (0.0)                                  | 20 (42.6) | 13 (26.5) | 33    | 5 (10.9)                                    | 23 (45.1) | 1 (1.8)   | 29    |
| Tanner IV       | 0 (0.0)                                  | 3 (6.4)   | 22 (44.9) | 25    | 0 (0.0)                                     | 9 (17.6)  | 40 (71.4) | 49    |
| Tanner V        | 0 (0.0)                                  | 0 (0.0)   | 7 (14.3)  | 7     | 0 (0.0)                                     | 1 (2.0)   | 15 (26.8) | 16    |

<sup>a</sup> Tanner stage missing in 16 (of 303) children with HIV

<sup>b</sup> Tanner stage missing in 3 (of 306) children without HIV

**Supplementary Table 4. The Relationship Between Stunting (height-for-age Z-score<-2) and Low Size-adjusted Total Body and Lumbar Spine Bone Density (Z-score<-2) in the 279 children with HIV and 293 children without HIV who had DXA scans performed**

| Participants with HIV<br>(n=279)     | TBLH-BMC <sup>LBM</sup> Z-score <-2<br>n=29 | TBLH-BMC <sup>LBM</sup> Z-score ≥-2<br>n=250 | p value | LS-BMAD Z-score <-2<br>n=40 | LS-BMAD Z-score ≥-2<br>n=239 | p value |
|--------------------------------------|---------------------------------------------|----------------------------------------------|---------|-----------------------------|------------------------------|---------|
|                                      | N (%)                                       |                                              |         | N (%)                       |                              |         |
| Height-for-age Z-score <-2<br>n=88   | 8 (27.6)                                    | 80 (32.0)                                    | 0.628   | 23 (57.5)                   | 65 (27.2)                    | <0.001  |
| Height-for-age Z-score ≥-2<br>n=191  | 21 (72.4)                                   | 170 (68.0)                                   |         | 17 (42.5)                   | 174 (72.8)                   |         |
| Participants without HIV<br>(n=293)  | TBLH-BMC <sup>LBM</sup> Z-score <-2<br>n=18 | TBLH-BMC <sup>LBM</sup> Z-score ≥-2<br>n=274 | p value | LS-BMAD Z-score <-2<br>n=17 | LS-BMAD Z-score ≥-2<br>n=276 | p value |
|                                      | N (%)                                       |                                              |         | N (%)                       |                              |         |
| Height-for-age Z-score <-2<br>n=24   | 1 (5.6)                                     | 23 (8.4)                                     | 0.488   | 2 (11.8)                    | 22 (8.0)                     | 0.478   |
| Height-for-age Z-score ≥-2<br>n= 269 | 17 (94.4)                                   | 251 (91.6)                                   |         | 15 (88.2)                   | 254 (92.0)                   |         |

Supplementary Table 5. Characteristics associated with TBLH-BMC<sup>LBM</sup> and LS-BMAD Z-Score in participants without HIV

| Characteristic                | N=293 <sup>1</sup> | TBLH-BMC <sup>LBM</sup> Z-Score                   |                                              |         |                                                                |         | LS-BMAD Z-Score                   |                                              |         |                                                                |         |
|-------------------------------|--------------------|---------------------------------------------------|----------------------------------------------|---------|----------------------------------------------------------------|---------|-----------------------------------|----------------------------------------------|---------|----------------------------------------------------------------|---------|
|                               |                    | Mean TBLH-BMC <sup>LBM</sup> Z-score <sup>2</sup> | Crude beta coefficient (95% CI) <sup>3</sup> | p value | Adjusted beta coefficient <sup>a</sup> (95% CI) <sup>3,4</sup> | p value | Mean LS BMAD Z-score <sup>2</sup> | Crude beta coefficient (95% CI) <sup>3</sup> | p value | Adjusted beta coefficient <sup>a</sup> (95% CI) <sup>3,4</sup> | p value |
| <b>Age (years)</b>            |                    |                                                   |                                              |         |                                                                |         |                                   |                                              |         |                                                                |         |
| 8-10                          | 96                 | -0.367                                            | Ref                                          | 0.051   | Ref                                                            | 0.673   | -0.066                            | Ref                                          | 0.159   | Ref                                                            | 0.001   |
| 11-13                         | 94                 | -0.611                                            | -0.24 (-0.53, 0.05)                          |         | -0.16 (-0.55, 0.23)                                            |         | -0.280                            | -0.21 (-0.56, 0.13)                          |         | -0.56 (-1.02, -0.11)                                           |         |
| 14-16                         | 103                | -0.254                                            | 0.10 (-0.18, 0.39)                           |         | -0.26 (-0.85, 0.34)                                            |         | -0.372                            | -0.33 (-0.66, 0.01)                          |         | -1.31 (-1.97, -0.65)                                           |         |
| <b>Sex</b>                    |                    |                                                   |                                              |         |                                                                |         |                                   |                                              |         |                                                                |         |
| Male                          | 143                | -0.562                                            | Ref                                          | 0.012   | Ref                                                            | 0.047   | -0.608                            | Ref                                          | <0.001  | Ref                                                            | <0.001  |
| Female                        | 150                | -0.258                                            | 0.29 (0.07, 0.52)                            |         | 0.24 (0.003, 0.49)                                             |         | 0.106                             | 0.70 (0.43, 0.97)                            |         | 0.53 (0.25, 0.81)                                              |         |
| <b>Pubertal status</b>        |                    |                                                   |                                              |         |                                                                |         |                                   |                                              |         |                                                                |         |
| Tanner I                      | 68                 | -0.309                                            | Ref                                          | 0.004   | Ref                                                            | 0.045   | -0.253                            | Ref                                          | 0.034   | Ref                                                            | 0.001   |
| Tanner II                     | 65                 | -0.705                                            | -0.41 (-0.74, -0.07)                         |         | -0.32 (-0.72, 0.09)                                            |         | -0.291                            | -0.02 (-0.43, 0.38)                          |         | 0.18 (-0.28, 0.65)                                             |         |
| Tanner III                    | 49                 | -0.598                                            | -0.26 (-0.63, 0.10)                          |         | -0.17 (-0.66, 0.33)                                            |         | -0.287                            | -0.05 (-0.49, 0.40)                          |         | 0.46 (-0.12, 1.04)                                             |         |
| Tanner IV                     | 88                 | -0.283                                            | 0.004 (-0.31, 0.32)                          |         | 0.21 (-0.40, 0.83)                                             |         | -0.363                            | -0.12 (-0.50, 0.27)                          |         | 0.93 (0.23, 1.63)                                              |         |
| Tanner V                      | 20                 | 0.170                                             | 0.48 (-0.01, 0.97)                           |         | 0.63 (-0.14, 1.40)                                             |         | -0.600                            | 0.85 (0.26, 1.45)                            |         | 1.86 (0.98, 2.74)                                              |         |
| <b>Socioeconomic status</b>   |                    |                                                   |                                              |         |                                                                |         |                                   |                                              |         |                                                                |         |
| SES Tertile 3 (high)          | 115                | -0.387                                            | Ref                                          | 0.660   | Ref                                                            | 0.615   | -0.238                            | Ref                                          | 0.999   | Ref                                                            | 0.956   |
| SES Tertile 2 (middle)        | 95                 | -0.477                                            | -0.10 (-0.37, 0.18)                          |         | -0.14 (-0.42, 0.14)                                            |         | -0.257                            | -0.007 (-0.34, 0.32)                         |         | -0.05 (-0.37, 0.27)                                            |         |
| SES Tertile 1 (low)           | 83                 | -0.353                                            | 0.03 (-0.26, 0.32)                           |         | -0.07 (-0.38, 0.21)                                            |         | -0.231                            | 0.001 (-0.35, 0.35)                          |         | -0.01 (-0.35, 0.33)                                            |         |
| <b>Orphanhood</b>             |                    |                                                   |                                              |         |                                                                |         |                                   |                                              |         |                                                                |         |
| Not an orphan                 | 271                | -0.420                                            | Ref                                          | 0.246   | Ref                                                            | 0.205   | -0.224                            | Ref                                          | 0.714   | Ref                                                            | 0.826   |
| 1 or 2 parents' dead          | 19                 | -0.161                                            | 0.28 (-0.19, 0.75)                           |         | 0.30 (-0.17, 0.78)                                             |         | -0.346                            | -0.10 (-0.67, 0.46)                          |         | -0.06 (-0.60, 0.48)                                            |         |
| <b>Physical activity</b>      |                    |                                                   |                                              |         |                                                                |         |                                   |                                              |         |                                                                |         |
| High, >3000 MET/wk            | 98                 | -0.288                                            | Ref                                          | 0.357   | Ref                                                            | 0.249   | -0.159                            | Ref                                          | 0.561   | Ref                                                            | 0.686   |
| Mod, 600-3000 MET/wk          | 84                 | -0.488                                            | -0.20 (-0.49, 0.10)                          |         | -0.23 (-0.53, 0.06)                                            |         | -0.358                            | -0.19 (-0.55, 0.17)                          |         | -0.15 (-0.50, 0.20)                                            |         |
| Low, <600 MET/wk              | 111                | -0.448                                            | -0.16 (-0.43, 0.11)                          |         | -0.18 (-0.46, 0.09)                                            |         | -0.228                            | -0.06 (-0.39, 0.28)                          |         | -0.09 (-0.41, 0.23)                                            |         |
| <b>Daily calcium intake</b>   |                    |                                                   |                                              |         |                                                                |         |                                   |                                              |         |                                                                |         |
| Mod, 300-450 mg/day           | 100                | -0.413                                            | Ref                                          | 0.996   | Ref                                                            | 0.805   | -0.265                            | Ref                                          | 0.715   | Ref                                                            | 0.745   |
| Low, 150-299 mg/day           | 64                 | -0.390                                            | -0.01 (-0.33, 0.31)                          |         | -0.09 (-0.41, 0.23)                                            |         | -0.149                            | 0.13 (-0.25, 0.51)                           |         | 0.07 (-0.30, 0.43)                                             |         |
| Very low, <150 mg/day         | 129                | -0.409                                            | 0.01 (-0.26, 0.27)                           |         | -0.08 (-0.35, 0.19)                                            |         | -0.271                            | -0.02 (-0.33, 0.30)                          |         | -0.07 (-0.37, 0.24)                                            |         |
| <b>Daily vitamin D intake</b> |                    |                                                   |                                              |         |                                                                |         |                                   |                                              |         |                                                                |         |
| Mod, 6.0-7.9 mcg/day          | 69                 | -0.534                                            | Ref                                          | 0.089   | Ref                                                            | 0.083   | -0.210                            | Ref                                          | 0.761   | Ref                                                            | 0.815   |
| Low, 4.0-5.9 mcg/day          | 189                | -0.418                                            | 0.114 (-0.168, 0.397)                        |         | 0.16 (-0.13, 0.44)                                             |         | -0.230                            | -0.03 (-0.37, 0.31)                          |         | -0.005 (-0.33, 0.32)                                           |         |
| Very low, <4.0 mcg/day        | 35                 | -0.089                                            | 0.459 (0.056, 0.862)                         |         | 0.48 (0.07, 0.89)                                              |         | -0.372                            | -0.18 (-0.67, 0.31)                          |         | -0.14 (-0.62, 0.34)                                            |         |

<sup>1</sup>Non-missing outcome data. <sup>2</sup>Arithmetic mean of non-missing outcome data. <sup>3</sup>Linear regression with robust standard errors. Missing data for TBLH-BMCLBM Z-score (n=14), LS BMAD Z-score (n=13), pubertal stage (n=3) and orphanhood (n=3) were imputed using chained equations. <sup>4</sup>Adjusted for age, sex, pubertal stage, orphanhood, socioeconomic status, physical activity, calcium and vitamin D intake
